# Supplementary material
Source: PubMed Central journal article supplement (PMC5521857)

SUPPLEMENTARY DATA

**Supplementary Figure 1. Neurogenin3 expression in *db/db* islets**

(A) Representative images of neurogenin3 and DAPI co-staining for positive control in duodenum crypt cells and (B) negative control in islets of lean mice. (C-D) Representative images of neurogenin3 and insulin (upper panels), and neurogenin3 and DAPI (lower panels) co-staining in *db/db* islets in ad libitum fed (C) and pair-fed (D).

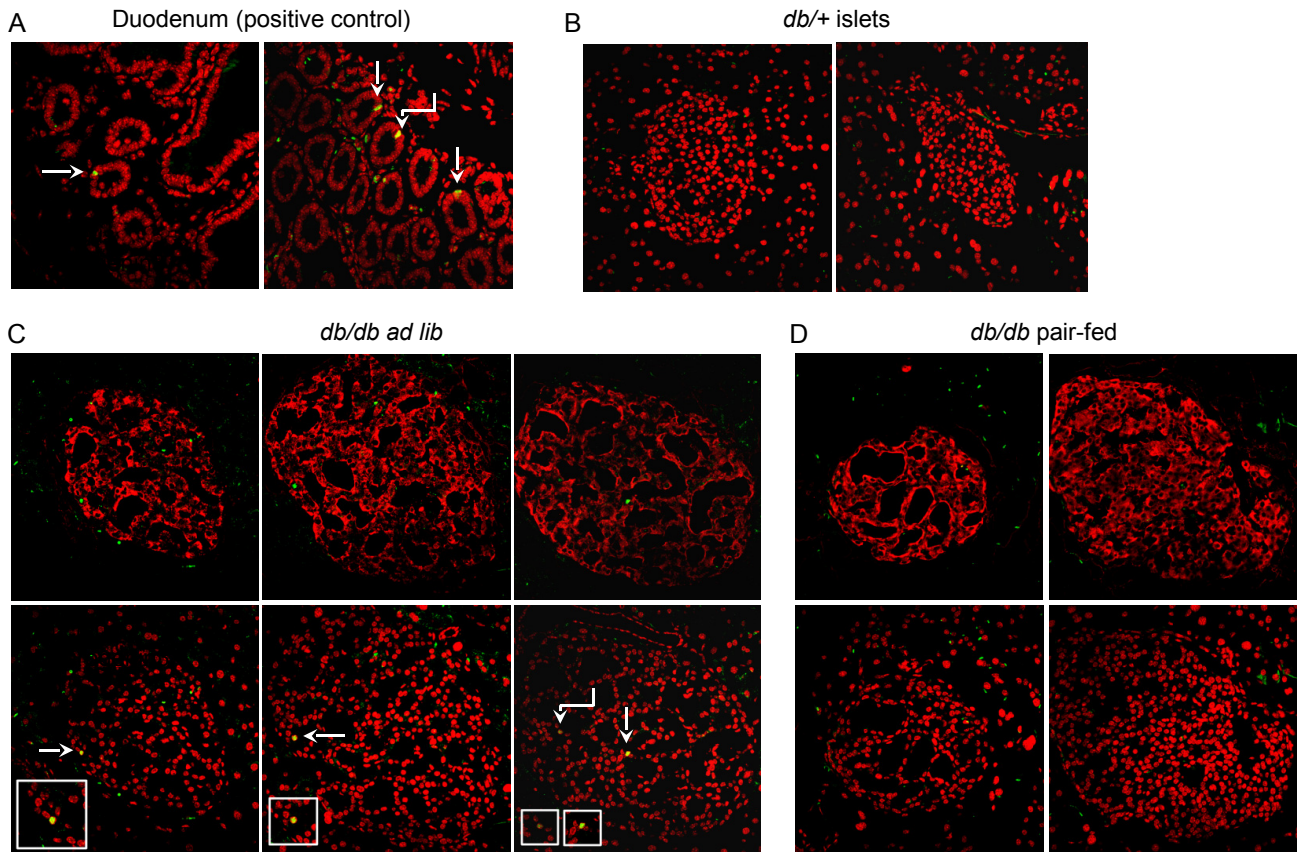

SUPPLEMENTARY DATA

**Supplementary Figure 2. Beta cell-specific gene expression in *db/db* islets**

(A) Representative images of Pdx1 and insulin co-staining in islets. (B) Relative gene expression levels of *mafa* and *neuroD1* in *db/+*, pair-fed *db/db* and ad lib *db/dbs*. Data show means  $\pm$  SEM. (n= 3-4). P values were calculated by *t*-test. Asterisks (\*\*) indicate  $p < 0.01$  between the denoted pairs.

A

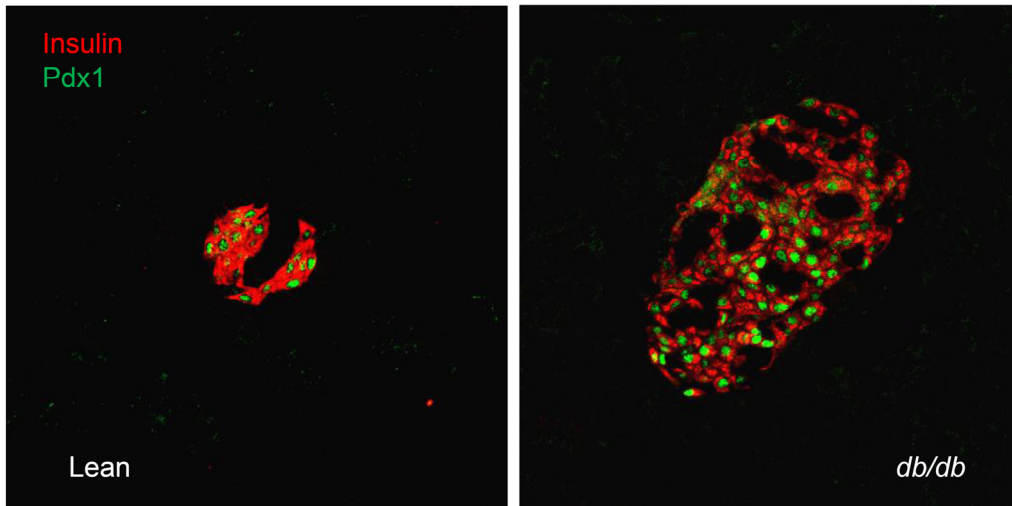

B

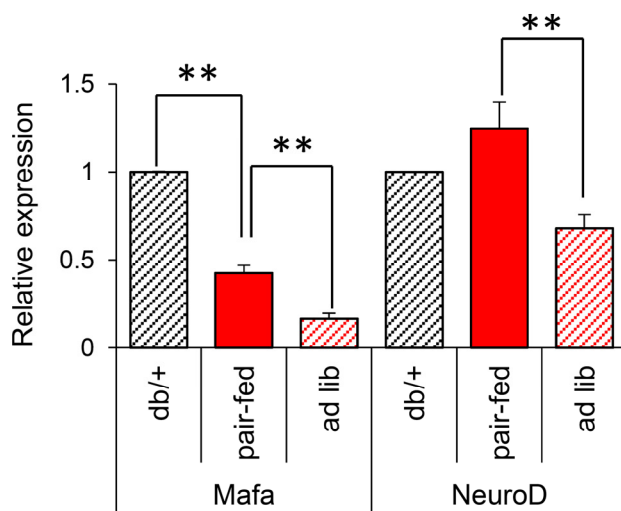

Supplement: DB161213SupplementaryData.pdf [file DB161213SupplementaryData.pdf]
